# Supplementary material for: A crab swarm at an ecological hotspot: patchiness and population density from AUV observations at a coastal, tropical seamount
Source: PubMed Central journal article supplement (PMC4841253; doi:10.7717/peerj.1770), 2016-04-12
Supplement: peerj-04-1770-s002.pdf [file peerj-04-1770-s002.pdf]

**Supplemental Materials, Table 1.** Mass stranding events of *Pleuroncodes planipes* in Southern California from January to August 2015 documented by multiple media outlets.

| <b>Date of observation</b> | <b>Publication Date</b> | <b>Reported Location(s)</b>                                                      | <b>Source</b>                                         | <b>Author</b>        | <b>Article Title</b>                                                   |
|----------------------------|-------------------------|----------------------------------------------------------------------------------|-------------------------------------------------------|----------------------|------------------------------------------------------------------------|
| 1/21/15                    | 1/22/15                 | Newport Beach                                                                    | Los Angeles Times                                     | Hannah Fry           | Thousands of fiery red crabs wash ashore in Newport Beach              |
| 2/21/15                    | 2/21/15                 | Balboa Island, Newport Beach                                                     | Orange County Register (California)                   | Laylan Connelly      | Thousands of small crabs wash up on O.C. coast in Balboa               |
| 6/14/15                    | 6/15/15                 | Dana Point, San Clemente, south Laguna, Newport Beach, Huntington Beach          | Orange County Register (California)                   | Laylan Connelly      | Red crabs blanket O.C. beaches                                         |
| 6/14/15                    | 6/15/15                 | Orange and San Diego Counties                                                    | Los Angeles Times                                     | Bryce Alderton       | Thousands of tiny red crabs invade Southern California beaches         |
| 6/14/15                    | 6/17/15                 | San Pedro, Rancho Palos Verde                                                    | Daily Breeze                                          | Megan Barnes         | Tiny red crabs wash up on beaches in San Pedro and Rancho Palos Verdes |
| 6/14/15                    | 6/17/15                 | Seal Beach to San Clemente                                                       | Orange County Register (California)                   | Laylan Connelly      | They're dead. They're red. They're smelly. (No, you can't eat them.)   |
| 6/14/15                    | 6/19/15                 | Laguna Beach, Huntington Beach, Newport Beach (Huntington Beach to San Clemente) | Laguna Beach Coastline Pilot (Costa Mesa, California) | Bryce Alderton       | Red crabs cover O.C. beaches from H.B. to San Clemente                 |
| 6/12/15                    | 6/19/15                 | San Diego Sunset Cliffs                                                          | Los Angeles Times                                     | Christopher Reynolds | Video: What does the red tide at San Diego's Sunset Cliffs portend?    |
| 8/15/15                    | 8/28/15                 | Channel Islands                                                                  | Los Angeles Times                                     | Veronica Rocha       | Watch thousands of tiny red crabs invade Channel Islands               |

**Supplemental Materials, Video S1.** *Pleuroncodes planipes* filmed from the M/V Alucias's RV2 submarine. (Video file uploaded separately, under the name "Hannibal\_swarm\_by\_Pineda\_subm.mp4")
